# Supplementary material for: An Innovative, Strengths-Based, Peer Mentoring Approach to Professional Development for Registered Dietitians
Source: Atypon-hosted journal article supplement (doi:10.3148/cjdpr-2015-027), 2015-10-09
Supplement: cjdpr-2015-027suppl.pdf [file cjdpr-2015-027suppl.pdf]

**Supplementary Table 1 - Evaluation survey questions**

|                                                                                                                                                                                        |                                                                                                                                                                                                                                                                                                                                                        |          |         |       |                |
|----------------------------------------------------------------------------------------------------------------------------------------------------------------------------------------|--------------------------------------------------------------------------------------------------------------------------------------------------------------------------------------------------------------------------------------------------------------------------------------------------------------------------------------------------------|----------|---------|-------|----------------|
| 1a. Did you participate in the Professional Development Network (PDN)?<br><i>If "No" is answered, respondent will be directed to answer question 1b and demographic questions only</i> | Yes/No                                                                                                                                                                                                                                                                                                                                                 |          |         |       |                |
| 1b. Please share any reasons why you did not participate?<br>(Select all that apply)<br><br><i>Respondents answering "no" from question 1a only</i>                                    | I was not interested in the PDN program<br>I did not understand the purpose of the PDN program<br>I was unsure of how to participate<br>I did not have time to participate<br>I forgot to participate<br>I already have sufficient resources for my professional development<br>I prefer to seek alternative approaches to my professional development |          |         |       |                |
| 2. How many dietitians <u>did you contact</u> to initiate a PDN meeting?                                                                                                               | 0<br>1<br>2<br>3<br>More than 3<br>Do not recall                                                                                                                                                                                                                                                                                                       |          |         |       |                |
| 3. How many dietitians <u>contacted you</u> to initiate a PDN meeting?                                                                                                                 | 0<br>1<br>2<br>3<br>More than 3<br>Do not recall                                                                                                                                                                                                                                                                                                       |          |         |       |                |
| 4. How many total* PDN meetings did you have in 2013?<br>(*include meetings when you approached someone and when someone approached you)                                               | 0<br>1<br>2<br>3<br>More than 3<br>Do not recall                                                                                                                                                                                                                                                                                                       |          |         |       |                |
| 5. Did you have any PDN meetings as a group*?<br>(* group = a meeting of 3 or more people, including yourself)                                                                         | Yes/No                                                                                                                                                                                                                                                                                                                                                 |          |         |       |                |
| 6. How many group* meetings did you have?<br>(* group = meeting of 3 or more people, including yourself)<br><br><i>Respondents answering "yes" from question 5 only</i>                | 1<br>2<br>3<br>More than 3                                                                                                                                                                                                                                                                                                                             |          |         |       |                |
| Please indicate your level of agreement with the following statements:                                                                                                                 | Strongly Disagree                                                                                                                                                                                                                                                                                                                                      | Disagree | Neutral | Agree | Strongly Agree |
| 7. I learned something valuable as a result of participating in the PDN                                                                                                                | 1                                                                                                                                                                                                                                                                                                                                                      | 2        | 3       | 4     | 5              |
| 8. I applied learning from my PDN meeting(s) to my personal career development                                                                                                         | 1                                                                                                                                                                                                                                                                                                                                                      | 2        | 3       | 4     | 5              |
| 9. The PDN increased my awareness of the expertise of dietitians in the dept.                                                                                                          | 1                                                                                                                                                                                                                                                                                                                                                      | 2        | 3       | 4     | 5              |
| 10. The PDN provided an opportunity for me to reflect on my own strengths                                                                                                              | 1                                                                                                                                                                                                                                                                                                                                                      | 2        | 3       | 4     | 5              |
| 11. I feel more connected to others in the department as a result of participating in the PDN                                                                                          | 1                                                                                                                                                                                                                                                                                                                                                      | 2        | 3       | 4     | 5              |
| 12. I feel more recognized for the work that I do as a result of participating in the PDN                                                                                              | 1                                                                                                                                                                                                                                                                                                                                                      | 2        | 3       | 4     | 5              |
| 13. Participating in the PDN contributed to my satisfaction with working at Providence Health Care (PHC)                                                                               | 1                                                                                                                                                                                                                                                                                                                                                      | 2        | 3       | 4     | 5              |
| 14. What do you like about the PDN?                                                                                                                                                    | (open-ended response)                                                                                                                                                                                                                                                                                                                                  |          |         |       |                |
| 15. Did you encounter any barriers to participating in the PDN?                                                                                                                        | Yes/No                                                                                                                                                                                                                                                                                                                                                 |          |         |       |                |
| If you answered "yes", please describe:                                                                                                                                                | (open-ended response)                                                                                                                                                                                                                                                                                                                                  |          |         |       |                |
| 16. What suggestions do you have to improve the PDN?                                                                                                                                   | (open-ended response)                                                                                                                                                                                                                                                                                                                                  |          |         |       |                |
| <b>Demographic Information</b>                                                                                                                                                         |                                                                                                                                                                                                                                                                                                                                                        |          |         |       |                |

|                                                                                                       |                                                                                                                                                 |
|-------------------------------------------------------------------------------------------------------|-------------------------------------------------------------------------------------------------------------------------------------------------|
| 17. Please indicate your age                                                                          | Under 25<br>25-30<br>31-40<br>41-50<br>51-60<br>61-70<br>Prefer not to answer                                                                   |
| 18. How many years have you been in dietetic practice?                                                | Less than 1 year<br>1-5 years<br>>5-10 years<br>>10-15 years<br>>15-20 years<br>More than 20 years                                              |
| 19. How many years have you been employed at PHC?                                                     | Less than 1 year<br>1-5 years<br>>5-10 years<br>>10-15 years<br>>15-20 years<br>More than 20 years                                              |
| 20. What is your <b>primary</b> area of practice at PHC? (area you work in the most)<br>(Select one)  | Acute care<br>Outpatient care<br>Residential care<br>I don't have a primary area. I work in multiple areas                                      |
| 21. What other areas of practice do you work in presently, outside of PHC?<br>(Select all that apply) | Acute care<br>Outpatient care<br>Residential care<br>Private practice<br>Other: (please specify)<br>I do not work elsewhere. I only work at PHC |
| 22. What PHC site do you work at?                                                                     | St. Paul's Hospital<br>Other (non St. Paul's Hospital sites)<br>I work at multiple sites                                                        |
| 23. What is your employment status at PHC?                                                            | Full time<br>Part time<br>Casual                                                                                                                |
| 24. If there is anything else related to the PDN you would like to share, please do so here           | (open-ended response)                                                                                                                           |
